# Supplementary material for: A New Method of Estimating Groundwater Evapotranspiration at Sub-Daily Scale Using Water Table Fluctuations
Source: MDPI journal article supplement (doi:10.3390/w14060876), 2022-03-11
Supplement: s1 [file s1]

Archive with 1 entries (1 files):
- water-1604921-supplementary.pdf
